# Supplementary material
Source: publisher figshare collection journal article supplement (https://gsapubs.figshare.com/articles/dataset/_/18809951)
Supplement: Supplementary file 1 [file 1]

## Sheet: Table A4
Supplemental Material 4.
TABLE S4. RECALCULATED CHEMICAL COMPOSITION OF THE RESIDUAL LIQUID AFTER CRYSTALLIZATION OF PHENOCRYSTS
F1
PO09		Volume (%)	Density (g/cm3)	Mass	Mass (%)	SiO2	TiO2	Al2O3	FeO	MnO	MgO	CaO	Na2O	K2O	P2O5	Total		SiO2	TiO2	Al2O3	FeO	MnO	MgO	CaO	Na2O	K2O	P2O5	Total
Bulk rock composition (wt.%)						59.35	0.742	17.34	5.63	0.094	3.54	6.6	3.86	1.51	0.15	98.816		62.06	0.89	15.99	5.16	0.097	3.81	5.39	4.26	1.69	0.22	99.567
Normalised bulk rock composition (wt.%)																		62.3299	0.89387	16.0595	5.18244	0.0974218	3.82657	5.41344	4.27853	1.69735	0.220957	100
MINERAL COMPOSITIONS (wt. %)
Phenocrysts	Olivine	1	3.35	3.35	1.2311	53.99	0.06	29.66	0.91	0	0.07	11.63	4.61	0.26	0	101.19		39.75			15.22	0.2	44.82					99.99
	Plagioclase	25.1	2.67	67.017	24.6282	52.75	0.33	3.09	15.07	0.34	25.7	1.88	0.1	0	0	99.26		56.79	0.06	27.45	0.43		0.04	9.34	5.44	0.44		99.99
	Clinopyroxene	0.6	3.23	1.938	0.712199													52.76		2.43	9.09	0.29	15.26	19.89	0.29			100.01
	Orthopyroxene	3.8	3.2	12.16	4.4687													53.35		0.9	20.96	0.46	23.05	1.25	0.02			99.99
	Groundmass	69.5	2.7	187.65	68.9598
		100		272.115	100
Pre-eruption (only taking into account phenocrysts)
Residual liquid composition						#REF!	#REF!	#REF!	#REF!	#REF!	#REF!	#REF!	#REF!	#REF!	#REF!	#REF!		45.0944	0.879094	9.24157	3.88779	0.0723383	2.12622	2.91565	2.93579	1.58899	0.220957	68.9628
Normalised residual liquid composition						#REF!	#REF!	#REF!	#REF!	#REF!	#REF!	#REF!	#REF!	#REF!	#REF!	#REF!		65.3894	1.27474	13.4008	5.63752	0.104895	3.08315	4.22786	4.25707	2.30412	0.3204	100
F1
PO41		Volume (%)	Density (g/cm3)	Mass	Mass (%)	SiO2	TiO2	Al2O3	FeO	MnO	MgO	CaO	Na2O	K2O	P2O5	Total		SiO2	TiO2	Al2O3	FeO	MnO	MgO	CaO	Na2O	K2O	P2O5	Total
Bulk rock composition (wt.%)						59.45	0.949	16.76	6.02	0.102	3.32	6.09	3.82	1.88	0.26	98.651		61.38	0.951	16.51	5.34	0.098	3.78	5.25	4.26	1.86	0.24	99.669
Normalised bulk rock composition (wt.%)																		61.5838	0.954158	16.5648	5.35773	0.0983255	3.79255	5.26744	4.27415	1.86618	0.240797	100
MINERAL COMPOSITIONS (wt. %)
Phenocrysts	Olivine	0.3	3.35	1.005	0.369764	55.08	0.09	29.02	0.9	0	0.07	11	4.64	0.4	0	101.2		39.7			15.44	0.22	44.61					99.97
	Plagioclase	26.1	2.67	69.687	25.6395	52.76	0.42	1.4	19.03	0.44	23.43	1.9	0.03	0	0	99.41		55.05	0.04	28.58	0.4		0.03	10.72	4.89	0.3		100.01
	Clinopyroxene	1.1	3.23	3.553	1.30724													52.88		1.89	10.21	0.27	14.97	19.49	0.28			99.99
	Orthopyroxene	3.6	3.2	11.52	4.23849													52.72		1.66	20.8	0.46	23.17	1.16	0.03			100
	Groundmass	68.9	2.7	186.03	68.445
		100		271.795	100
Pre-eruption (only taking into account phenocrysts)
Residual liquid composition						#REF!	#REF!	#REF!	#REF!	#REF!	#REF!	#REF!	#REF!	#REF!	#REF!	#REF!		44.3967	0.943902	9.14198	4.18301	0.0744854	2.44216	2.21493	3.01544	1.78926	0.240797	68.4426
Normalised residual liquid composition						#REF!	#REF!	#REF!	#REF!	#REF!	#REF!	#REF!	#REF!	#REF!	#REF!	#REF!		64.867	1.37911	13.3571	6.1117	0.108829	3.56818	3.23618	4.40579	2.61424	0.351823	100
F2
PO54		Volume (%)	Density (g/cm3)	Mass	Mass (%)	SiO2	TiO2	Al2O3	FeO	MnO	MgO	CaO	Na2O	K2O	P2O5	Total		SiO2	TiO2	Al2O3	FeO	MnO	MgO	CaO	Na2O	K2O	P2O5	Total
Bulk rock composition (wt.%)						60.39	0.933	16.51	5.9	0.101	3.43	6.09	3.79	1.94	0.27	99.354		61.53	0.936	16.32	5.33	0.097	3.84	5.41	4.18	1.77	0.23	99.643
Normalised bulk rock composition (wt.%)																		61.7504	0.939353	16.3785	5.3491	0.0973475	3.85376	5.42938	4.19498	1.77634	0.230824	100
MINERAL COMPOSITIONS (wt. %)
Phenocrysts	Olivine	0.8	3.35	2.68	0.984899	55.34	0.09	28.97	0.92	0	0.07	10.74	4.9	0.41	0	101.44		39.7			15.67	0.18	44.43					99.98
	Plagioclase	24.3	2.67	64.881	23.8438	53.12	0.32	2.58	15.32	0.36	26.56	1.47	0.03	0	0	99.76		55.83	0.03	28.17	0.35		0.04	10.13	5.08	0.36		99.99
	Clinopyroxene	0.6	3.23	1.938	0.712215													52.81		1.93	10.73	0.24	14.66	19.35	0.29			100.01
	Orthopyroxene	4	3.2	12.8	4.704													52.96		1.18	20.79	0.45	23.35	1.25	0.02			100
	Groundmass	70.3	2.7	189.81	69.7551
		100		272.109	100
Pre-eruption (only taking into account phenocrysts)
Residual liquid composition						47.1792	0.855814	15.6095	2.23808	0.0151625	-2.90359	5.63372	3.73459	1.93596	0.27	74.5684		45.1801	0.9322	9.59243	4.05693	0.0726974	2.20384	2.8174	2.98071	1.6905	0.230824	69.7576
Normalised residual liquid composition						63.2696	1.14769	20.9331	3.00137	0.0203337	-3.89386	7.5551	5.00827	2.59622	0.362084	100		64.7673	1.33634	13.7511	5.81575	0.104214	3.15927	4.03884	4.27295	2.4234	0.330894	100
F3
PO28		Volume (%)	Density (g/cm3)	Mass	Mass (%)	SiO2	TiO2	Al2O3	FeO	MnO	MgO	CaO	Na2O	K2O	P2O5	Total		SiO2	TiO2	Al2O3	FeO	MnO	MgO	CaO	Na2O	K2O	P2O5	Total
Bulk rock composition (wt.%)						60.39	0.933	16.51	5.9	0.101	3.43	6.09	3.79	1.94	0.27	99.354		62.54	0.77	16.25	5.42	0.1	2.72	4.87	4.01	1.82	0.18	98.68
Normalised bulk rock composition (wt.%)																		63.3766	0.7803	16.4674	5.4925	0.101338	2.75638	4.93514	4.06364	1.84435	0.182408	100
MINERAL COMPOSITIONS (wt. %)
Phenocrysts	Olivine	0.3	3.35	1.005	0.36945	55.34	0.09	28.97	0.92	0	0.07	10.74	4.9	0.41	0	101.44		39.7			15.67	0.18	44.43					99.98
	Plagioclase	33.1	2.67	88.377	32.4884	53.12	0.32	2.58	15.32	0.36	26.56	1.47	0.03	0	0	99.76		57.14	0.04	27.28	0.4		0.04	8.95	5.72	0.43		100
	Clinopyroxene	0.8	3.23	2.584	0.949909													53.41		1.94	8.66	0.24	15.01	20.53	0.22			100.01
	Orthopyroxene	4.8	3.2	15.36	5.64652													53.12		1.1	20.83	0.5	23.25	1.16	0.03			99.99
	Groundmass	61	2.7	164.7	60.5457
		100		272.026	100
Pre-eruption (only taking into account phenocrysts)
Residual liquid composition						47.1792	0.855814	15.6095	2.23808	0.0151625	-2.90359	5.63372	3.73459	1.93596	0.27	74.5684		46.4821	0.770762	9.89723	4.20127	0.0743355	1.10867	2.60034	2.6968	1.74182	0.182408	69.7557
Normalised residual liquid composition						63.2696	1.14769	20.9331	3.00137	0.0203337	-3.89386	7.5551	5.00827	2.59622	0.362084	100		66.6355	1.10494	14.1884	6.02283	0.106565	1.58936	3.72779	3.86606	2.49702	0.261495	100
F3
PO32		Volume (%)	Density (g/cm3)	Mass	Mass (%)	SiO2	TiO2	Al2O3	FeO	MnO	MgO	CaO	Na2O	K2O	P2O5	Total		SiO2	TiO2	Al2O3	FeO	MnO	MgO	CaO	Na2O	K2O	P2O5	Total
Bulk rock composition (wt.%)						60.39	0.933	16.51	5.9	0.101	3.43	6.09	3.79	1.94	0.27	99.354		62.83	0.79	16.87	5.57	0.1	2.96	5.13	4.13	1.77	0.18	100.33
Normalised bulk rock composition (wt.%)																		62.6233	0.787402	16.8145	5.55168	0.0996711	2.95026	5.11313	4.11642	1.76418	0.179408	100
MINERAL COMPOSITIONS (wt. %)
Phenocrysts	Olivine	0.5	3.35	1.675	0.616189	55.34	0.09	28.97	0.92	0	0.07	10.74	4.9	0.41	0	101.44		39.7			15.67	0.18	44.43					99.98
	Plagioclase	23.9	2.67	63.813	23.4752	53.12	0.32	2.58	15.32	0.36	26.56	1.47	0.03	0	0	99.76		55.17	0.04	28.62	0.46		0.05	10.47	4.94	0.27		100.02
	Clinopyroxene	0.8	3.23	2.584	0.950587													52.9	0.44	1.52	11.06	0.38	14.67	18.84	0.18			99.99
	Orthopyroxene	3.6	3.2	11.52	4.23791													54.09	0.23	1.68	15.82	0.35	26.7	1.1	0.03			100
	Groundmass	71.2	2.7	192.24	70.7202
		100		271.832	100
Pre-eruption (only taking into account phenocrysts)
Residual liquid composition						47.1792	0.855814	15.6095	2.23808	0.0151625	-2.90359	5.63372	3.73459	1.93596	0.27	74.5684		46.1566	0.763911	9.90058	4.46472	0.0787279	1.1403	2.43076	2.93584	1.6998	0.179408	69.7506
Normalised residual liquid composition						63.2696	1.14769	20.9331	3.00137	0.0203337	-3.89386	7.5551	5.00827	2.59622	0.362084	100		66.1737	1.0952	14.1942	6.40098	0.11287	1.63483	3.48493	4.20905	2.43697	0.257213	100
F4
PO18		Volume (%)	Density (g/cm3)	Mass	Mass (%)	SiO2	TiO2	Al2O3	FeO	MnO	MgO	CaO	Na2O	K2O	P2O5	Total		SiO2	TiO2	Al2O3	FeO	MnO	MgO	CaO	Na2O	K2O	P2O5	Total
Bulk rock composition (wt.%)						60.39	0.933	16.51	5.9	0.101	3.43	6.09	3.79	1.94	0.27	99.354		64.56	0.74	16.11	5.15	0.09	2.72	4.96	4.1	1.7	0.18	100.31
Normalised bulk rock composition (wt.%)																		64.3605	0.737713	16.0602	5.13408	0.0897219	2.71159	4.94467	4.08733	1.69475	0.179444	100
MINERAL COMPOSITIONS (wt. %)
Phenocrysts	Olivine	0	3.35	0	0	55.34	0.09	28.97	0.92	0	0.07	10.74	4.9	0.41	0	101.44		39.7			15.67	0.18	44.43					99.98
	Plagioclase	31.1	2.67	83.037	30.5363	53.12	0.32	2.58	15.32	0.36	26.56	1.47	0.03	0	0	99.76		56.69	0.03	27.61	0.41		0.03	9.51	5.35	0.37		100
	Clinopyroxene	0.4	3.23	1.292	0.475124													52.44	0.47	1.7	11.54	0.45	14.13	19.02	0.25			100
	Orthopyroxene	5.3	3.2	16.96	6.23692													53.23	0.23	1.45	18.85	0.42	24.48	1.28	0.06			100
	Groundmass	63.2	2.7	170.64	62.7517
		100		271.929	100
Pre-eruption (only taking into account phenocrysts)
Residual liquid composition						47.1792	0.855814	15.6095	2.23808	0.0151625	-2.90359	5.63372	3.73459	1.93596	0.27	74.5684		47.575	0.716393	9.39664	3.9131	0.0649873	1.01468	2.48146	2.80709	1.60652	0.179444	69.7553
Normalised residual liquid composition						63.2696	1.14769	20.9331	3.00137	0.0203337	-3.89386	7.5551	5.00827	2.59622	0.362084	100		68.2027	1.02701	13.4709	5.60975	0.0931646	1.45462	3.55737	4.02419	2.30308	0.257247	100
F4
PO16		Volume (%)	Density (g/cm3)	Mass	Mass (%)	SiO2	TiO2	Al2O3	FeO	MnO	MgO	CaO	Na2O	K2O	P2O5	Total		SiO2	TiO2	Al2O3	FeO	MnO	MgO	CaO	Na2O	K2O	P2O5	Total
Bulk rock composition (wt.%)						60.39	0.933	16.51	5.9	0.101	3.43	6.09	3.79	1.94	0.27	99.354		63.76	0.75	16.27	5.29	0.09	2.7	4.84	4.17	1.77	0.15	99.79
Normalised bulk rock composition (wt.%)																		63.8942	0.751578	16.3042	5.30113	0.0901894	2.70568	4.85019	4.17878	1.77372	0.150316	100
MINERAL COMPOSITIONS (wt. %)
Phenocrysts	Olivine	0.2	3.35	0.67	0.245711	55.34	0.09	28.97	0.92	0	0.07	10.74	4.9	0.41	0	101.44		39.7			15.67	0.18	44.43					99.98
	Plagioclase	29	2.67	77.43	28.3961	53.12	0.32	2.58	15.32	0.36	26.56	1.47	0.03	0	0	99.76		55.96	0.03	28.04	0.46		0.03	9.91	5.19	0.38		100
	Clinopyroxene	0.6	3.23	1.938	0.710728													52.53	0.49	1.74	10.6	0.33	14.61	19.46	0.25			100.01
	Orthopyroxene	6.2	3.2	19.84	7.27598													52.65	0.23	0.98	22.31	0.51	22.07	1.24	0.02			100.01
	Groundmass	64	2.7	172.8	63.3714
		100		272.678	100
Pre-eruption (only taking into account phenocrysts)
Residual liquid composition						47.1792	0.855814	15.6095	2.23808	0.0151625	-2.90359	5.63372	3.73459	1.93596	0.27	74.5684		47.3094	0.730116	9.55996	3.91216	0.0620759	1.11871	2.29034	2.93856	1.68312	0.150316	69.7548
Normalised residual liquid composition						63.2696	1.14769	20.9331	3.00137	0.0203337	-3.89386	7.5551	5.00827	2.59622	0.362084	100		67.8225	1.04669	13.7051	5.60845	0.0889916	1.60378	3.28342	4.2127	2.41291	0.215492	100
